# Supplementary material for: MRE11 UFMylation promotes ATM activation
Source: PubMed Central journal article supplement (PMC6486557; doi:10.1093/nar/gkz110), 2019-02-20

## Supplementary Material

### Supplementary figure legends

#### Supplementary Figure 1 UFMylation is involved in the DDR

**A. UFL1 was recruited to DNA damage stripes.** U2OS cells were micro-irradiated with a UV laser (365 nm), then fixed with 4% PFA for 5 min at room temperature followed by ice-cold methanol at 4°C for 20 min, and then co-immunostained with antibodies against UFL1 (green) and  $\gamma$ H2AX (red). **B. DNA damage induced an increase of UFL1 loading onto chromatin.** U2OS cells were treated with 10  $\mu$ g/ml bleomycin or exposed to 5 Gy X-ray irradiation. Chromatin fractionation assays were performed at the indicated times.

#### Supplementary Figure 2 UFL1/UfSP2 dynamically interacts with the MRN complex in response to ionizing radiation (IR)

**A. IR-induced interaction between HA-UFL1 and GFP-MRE11.** HEK293T cells co-expressing HA-UFL1 and GFP-MRE11 were irradiated at a dose of 5 Gy. Total cell lysates were harvested at the indicated time points after IR and subjected to immunoprecipitation and immunoblotting with the indicated antibodies. **B. IR disrupted the interaction between HA-UfSP2 and GFP-MRE11.** HEK293T cells co-expressing HA-UfSP2 and GFP-MRE11 were irradiated at a dose of 5 Gy. Total cell lysates were harvested at different times as indicated, and subjected to immunoprecipitation and immunoblotting with the indicated antibodies.

#### Supplementary Figure 3 UFMylation promotes MRE11 recruitment to the DNA damage stripes

**A & B. UFL1 depletion decreased the initial recruitment of NBS1 to DNA damage**

**stripes.** UFL1-depleted (siUFL1) or mock (siCTR)-depleted DU145 cells transiently expressed NBS1-GFP. **C & D. Over-expression of UfSP2 decreased the initial recruitment of NBS1 to DNA damage stripes.** DU145 cells were co-transfected with a HA vector, HA-UfSP2 or HA-UfSP2(C302S) and NBS1-GFP at a molar ratio of 10:1. GFP-positive cells were micro-irradiated with a UV laser (365 nm) and consecutive images were captured at 10-sec intervals for 10 min. Representative images of GFP-MRE11 recruitment are shown in A and C, and statistical analyses of the recruitment dynamics with the Spearman's rank-order correlation test are shown in B and D.

**Supplementary Figure 4 Recruitment dynamics of UFL1 to the DNA damage site.**

U2OS cells were exposed to 5-Gy X-ray irradiation, fixed at the indicated timepoints after IR, and subjected to immunofluorescence staining with the indicated antibodies.

A. Representative images of UFL1 foci and  $\gamma$ H2AX foci are shown. B. Representative images of MRE11 foci and  $\gamma$ H2AX foci are shown. C. The number of UFL1 foci or MRE11 foci per cell that colocalized with  $\gamma$ H2AX foci from at least 30 individual cells was determined and statistically analyzed by two-way ANOVA.

**Supplementary Figure 5 MRE11 is required for optimal recruitment of UFL1 to the DNA damage site.**

A549 cells stably expressing shCTR or shMRE11 were re-introduced with FLAG-MRE11 or FLAG-MRE11(K282R) or FLAG-MRE11(G285C).

The cells were treated with 5-Gy IR, then fixed after 10 min, and subjected to immunofluorescence staining with the indicated antibodies. A. Representative images of UFL1 foci and  $\gamma$ H2AX foci are shown. B. The number of UFL1 foci per cell that colocalized with  $\gamma$ H2AX foci from at least 30 individual cells was determined and statistically analyzed by a two-way ANOVA test. MRE11 knockdown efficiency is also

shown.

**Supplementary Figure 6 UFMylation-defective mutants compromised DNA damage-induced ATM activation.** A549 cells stably expressing shCTR or shMRE11 were re-introduced with FLAG-MRE11 or FLAG-MRE11(K282R) or FLAG-MRE11(G285C). The cells were treated with 5-Gy IR. Total cell lysates were harvested 20 min after IR and analyzed by SDS-PAGE and immunoblotting with the indicated antibodies.

# Wang et al., Supplementary Figure 1

## A

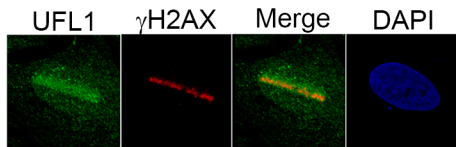

## B

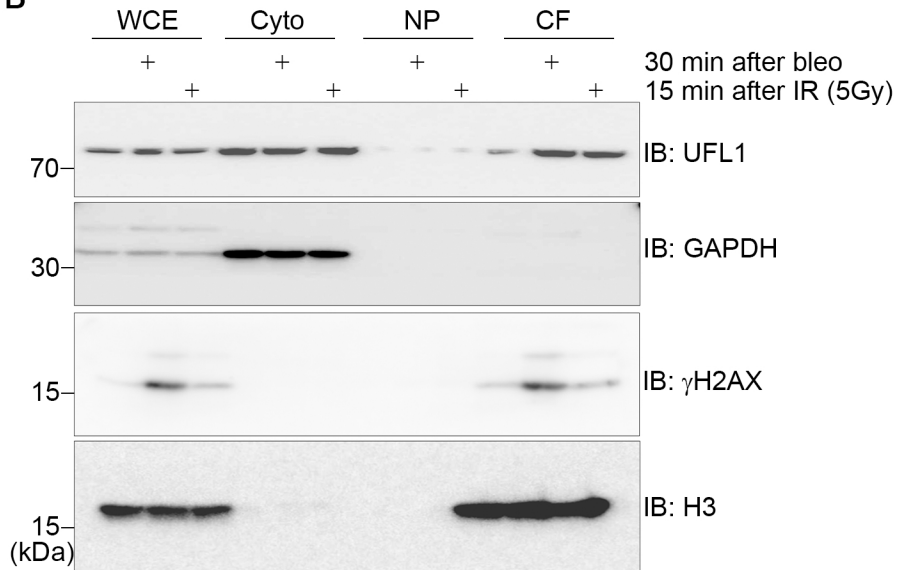

# Wang et al., Supplementary Figure 2

## A

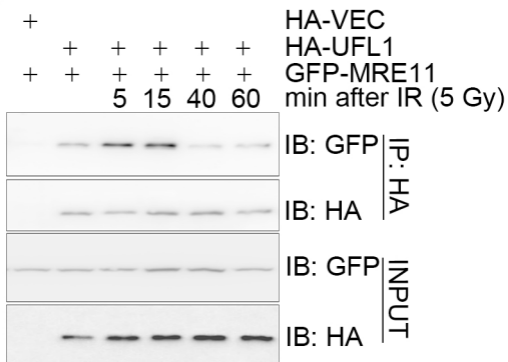

## B

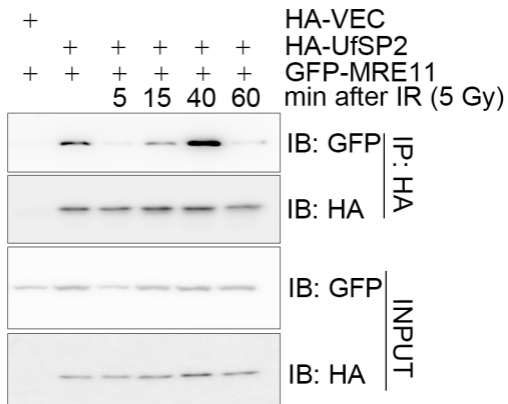

A

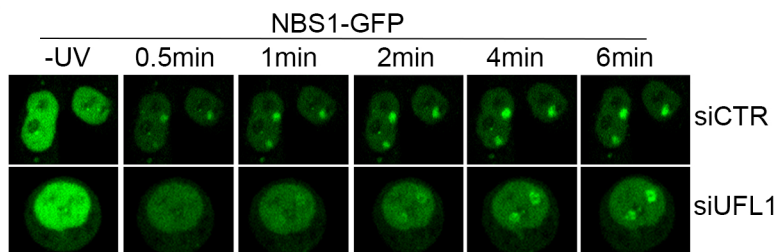

B

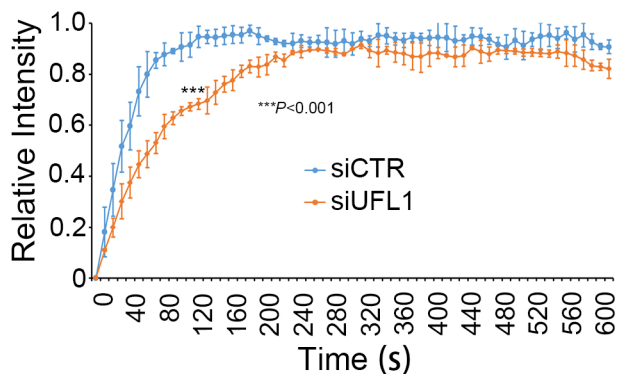

C

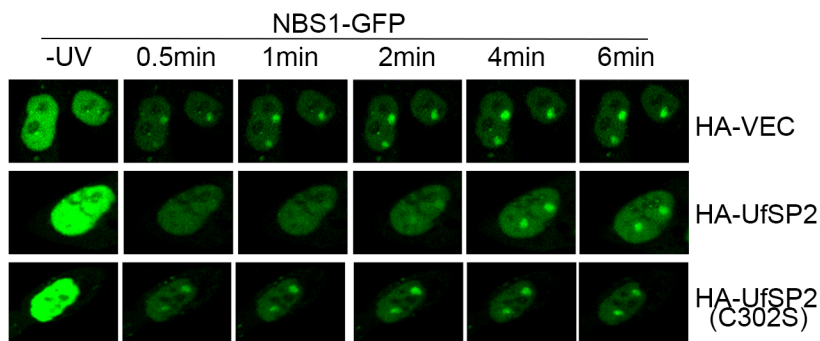

D

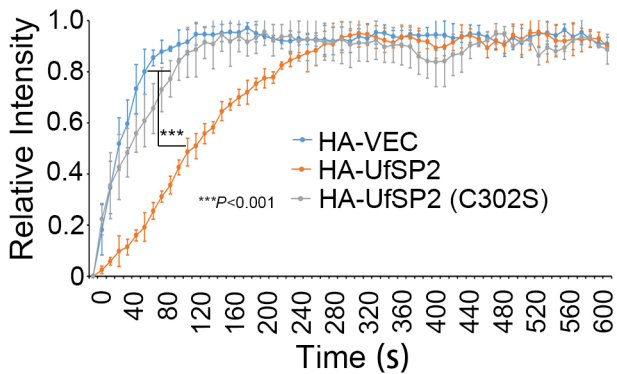

A

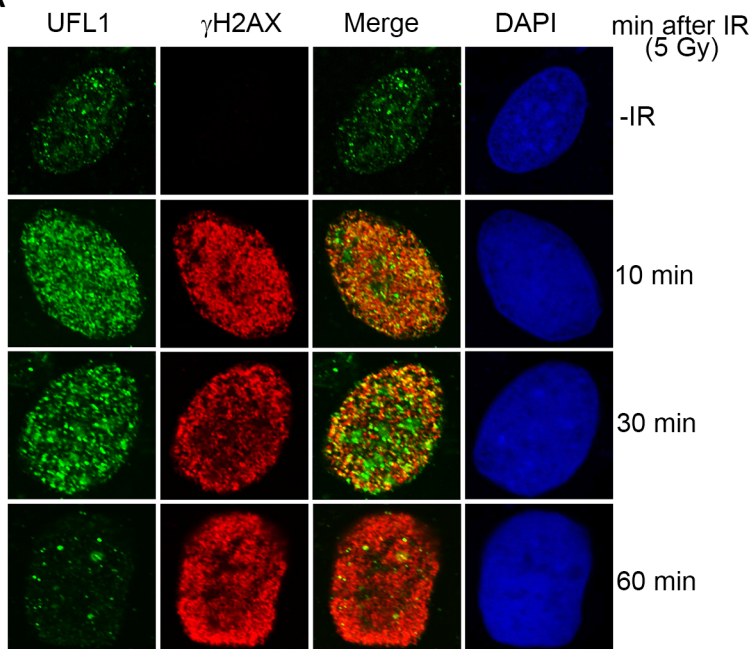

B

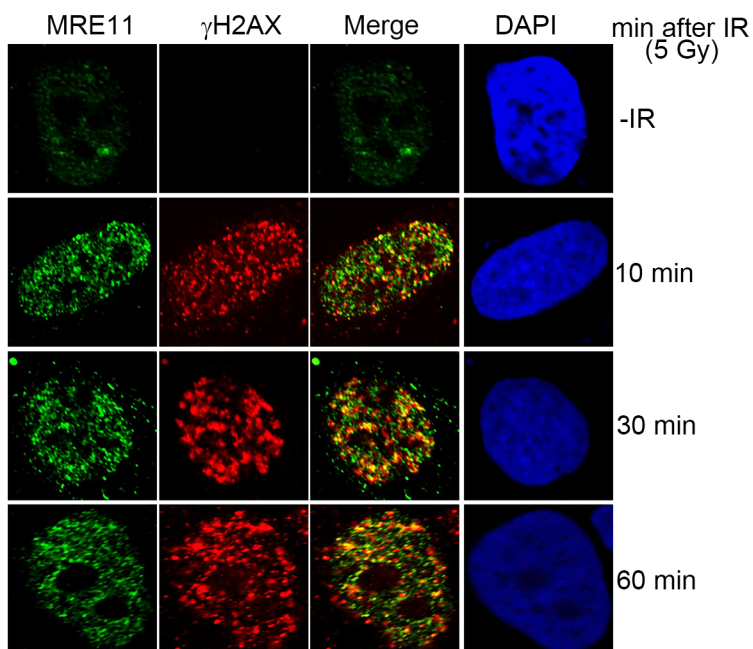

C

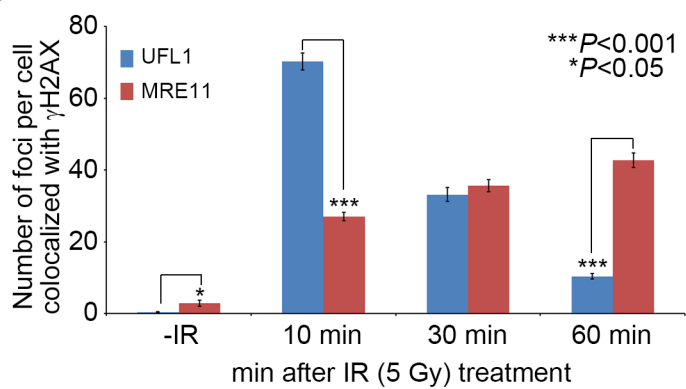

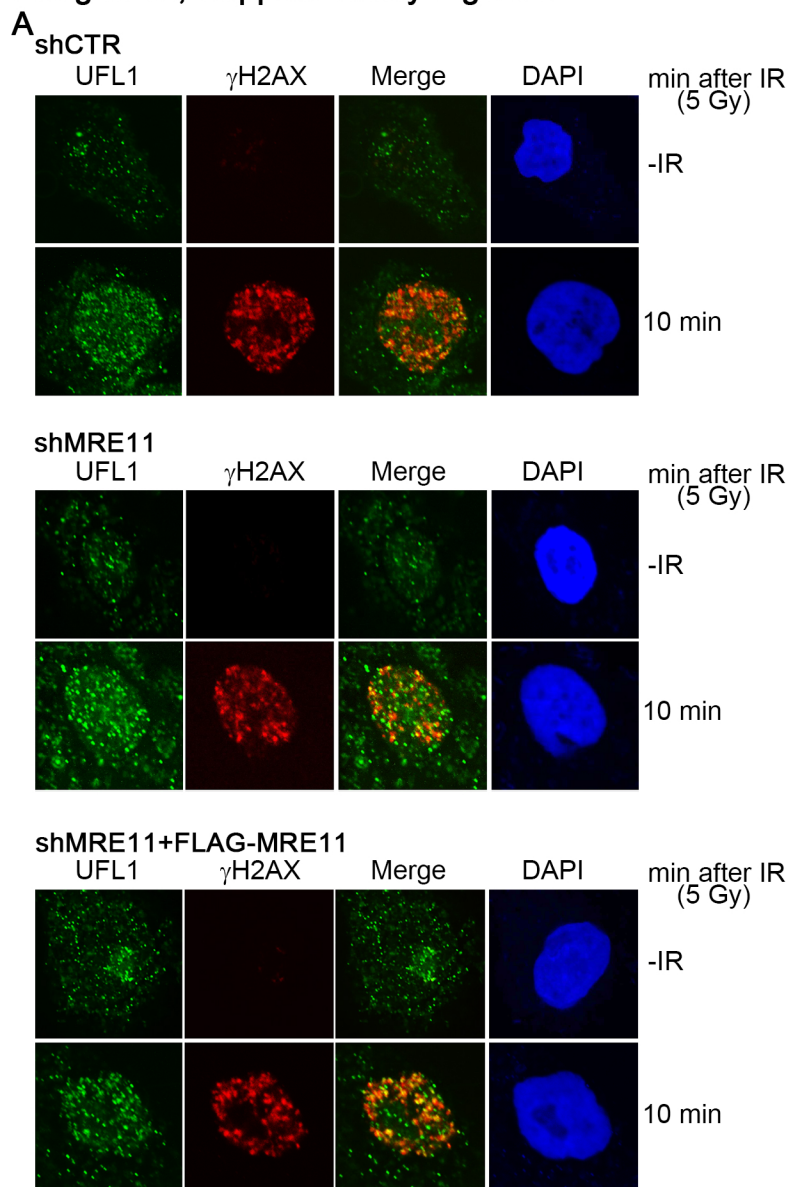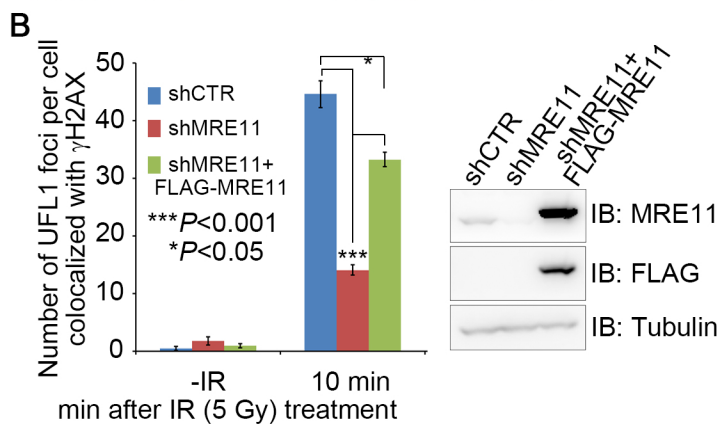

Supplement: gkz110_supplemental_file.pdf [file gkz110_supplemental_file.pdf]
